# Supplementary material
Source: PubMed Central journal article supplement (PMC2847520)
Supplement: E09-10-0910_1.pdf [file E09-10-0910_1.pdf]

## SUPPLEMENTAL DATA

### FIGURE LEGENDS TO SUPPLEMENTARY DATA

**Figure S1. Wsc1p variants are misfolded.** (A) Schematic representation of HA-tagged Wsc1p and its variants. The indicated mutations are marked by asterisks. S.S., signal sequence; TM, transmembrane domain; Cyt, cytoplasmic domain. (B) Pulse-chase analysis was performed in wild type and *sec12-4* strains expressing Wsc1p and  $\Delta 68-80$  as described in Figure 1B. (C) The folding status of Wsc1p and its variants were examined by a PEGylation-based folding assay as described in Figure 1D.

**Figure S2. Degradation of Wsc1p variants is ERAD independent.** (A-E) The turnover rates of Wsc1p variants in WT,  $\Delta cue1$ ,  $\Delta hrd1$  and  $\Delta doa10$  cells were examined by pulse-chase analysis as described in Figure 2A.

**Figure S3. Wsc1- $\Delta 68-80$  is stable when retained in the ER.** Stability of Wsc1- $\Delta 68-80$  was examined in wild type and *sec12-4* strains using pulse-chase analysis as described in Figure 3A.

**Figure S4. Wsc1p variants degrade in the vacuole.** (A-B) Pulse-chase analysis was performed to examine the degradation of Wsc1p variants in wild type and  $\Delta pep4$  cells as described in Figure 2A.

**Figure S5. Visualization of the vacuolar ATPase by indirect immunofluorescence.** Wild type cells were processed as described in Figure 3D and stained with anti-V-ATPase (60 kDa subunit) primary antibodies followed by Alexa Fluor 546 goat anti-mouse secondary antibodies. The cells

were visualized by confocal and DIC microscopy. Note that V-ATPase staining coincides with structures that appear as optical depressions using DIC. Scale bar, 5  $\mu$ m.

**Figure S6. Degradation of Wsc1-L63R is autophagy independent.** (A) Wild type and  $\Delta$ *apg8* cells expressing Wsc1-L63R were analyzed by pulse-chase analysis as described in Figure 2A. (B) Wsc1-L63R turnover was analyzed by pulse-chase analysis in wild type and  $\Delta$ *vps10* cells as described in Figure 2A.

**Figure S7. Wsc1- $\Delta$ 68-80 does not contain an ERAD determinant in the luminal domain.** (A) A schematic diagram of Wsc1- $\Delta$ 68-80 and Wsc1- $\Delta$ 68-80<sub>Luminal</sub>. S.S., signal sequence; TM, transmembrane domain; Cyt, cytoplasmic domain. (B) The localization of Wsc1- $\Delta$ 68-80<sub>Luminal</sub> was examined by indirect immunofluorescence as described in Figure 5B. Scale bar, 5  $\mu$ m. (C) The turnover of Wsc1- $\Delta$ 68-80 and Wsc1- $\Delta$ 68-80<sub>Luminal</sub> in the wild type strain was measured by pulse-chase analysis as described in Figure 2A. (D) Pulse-chase analysis was performed in wild type and *sec12-4* strains expressing Wsc1- $\Delta$ 68-80<sub>Luminal</sub> as described in Figure 1B.

**Figure S8. Wsc1- $\Delta$ 68-80 fused with an ERAD determinant is recognized by ERAD.** (A) Schematic representation of ED-Wsc1- $\Delta$ 68-80 and ED-Wsc1- $\Delta$ 68-80<sub>Luminal</sub>. The CPY C-terminal domain contains a single carbohydrate and is represented by a branched symbol. S.S., signal sequence of Kar2p; CPY CTD, the CPY C-terminal domain; TM, transmembrane domain; Cyt, cytoplasmic domain. (B) The turnover of ED-Wsc1- $\Delta$ 68-80 was examined in wild type and various mutants using pulse-chase analysis as described in Figure 2A. (C) Wild type and mutant

cells expressing ED-Wsc1- $\Delta$ 68-80<sub>Luminal</sub> were analyzed by pulse-chase analysis as described in Figure 2A.

## SUPPLEMENTARY TABLES

**Table S1. Strains used in this study**

| <b>Strain</b> | <b>Genotype</b>                                                                                                                                | <b>Source</b>                     |
|---------------|------------------------------------------------------------------------------------------------------------------------------------------------|-----------------------------------|
| W303          | <i>Mata</i> , <i>leu2-3, 112, his3-11, trp1-1, ura3-1, can1-100, ade2-1</i>                                                                    | P. Walter (UCSF)                  |
| BY4742        | <i>Mata<math>\alpha</math></i> , <i>leu2<math>\Delta</math>0, lys2<math>\Delta</math>0, his3<math>\Delta</math>1, ura3<math>\Delta</math>0</i> | Research Genetics, Huntsville, AL |
| ESY258        | <i>Mata</i> , pDN436, W303 background                                                                                                          | Spear and Ng, 2003                |
| SWY300        | <i>Mata</i> , pRS315, W303 background                                                                                                          | This study                        |
| SWY330        | <i>Mata</i> , pSW100, W303 background                                                                                                          | This study                        |
| SWY382        | <i>Mata</i> , <i>sec12-4</i> , pSW100, W303 background                                                                                         | This study                        |
| SWY338        | <i>Mata</i> , pSW102, W303 background                                                                                                          | This study                        |
| SWY383        | <i>Mata</i> , <i>sec12-4</i> , pSW102, W303 background                                                                                         | This study                        |
| SWY339        | <i>Mata</i> , <i>cue1::TRP1</i> , pSW102, W303 background                                                                                      | This study                        |
| SWY340        | <i>Mata</i> , <i>hrd1::KANMX</i> , pSW102, W303 background                                                                                     | This study                        |
| SWY614        | <i>Mata</i> , <i>doa10::KANMX</i> , pSW102, W303 background                                                                                    | This study                        |
| SWY341        | <i>Mata</i> , <i>pep4::HIS3</i> , pSW102, W303 background                                                                                      | This study                        |
| SWY342        | <i>Mata</i> , pSW104, W303 background                                                                                                          | This study                        |
| SWY384        | <i>Mata</i> , <i>sec12-4</i> , pSW104, W303 background                                                                                         | This study                        |
| SWY343        | <i>Mata</i> , <i>cue1::TRP1</i> , pSW104, W303 background                                                                                      | This study                        |
| SWY344        | <i>Mata</i> , <i>hrd1::KANMX</i> , pSW104, W303 background                                                                                     | This study                        |
| SWY367        | <i>Mata</i> , <i>doa10::KANMX</i> , pSW104, W303 background                                                                                    | This study                        |
| SWY345        | <i>Mata</i> , <i>pep4::HIS3</i> , pSW104, W303 background                                                                                      | This study                        |
| SWY416        | <i>Mata</i> , <i>vps10::KANMX</i> , pSW104, W303 background                                                                                    | This study                        |
| SWY653        | <i>Mata</i> , <i>ktr1::KANMX, ktr3::KANMX, kre2::TRP1</i> , pSW104, W303 background                                                            | This study                        |
| SWY402        | <i>Mata<math>\alpha</math></i> , pSW104, BY4742 background                                                                                     | This study                        |
| SWY403        | <i>Mata<math>\alpha</math></i> , <i>apg8::KANMX</i> , pSW104, BY4742 background                                                                | This study                        |
| SWY346        | <i>Mata</i> , pSW105, W303 background                                                                                                          | This study                        |
| SWY385        | <i>Mata</i> , <i>sec12-4</i> , pSW105, W303 background                                                                                         | This study                        |
| SWY347        | <i>Mata</i> , <i>cue1::TRP1</i> , pSW105, W303 background                                                                                      | This study                        |
| SWY348        | <i>Mata</i> , <i>hrd1::KANMX</i> , pSW105, W303 background                                                                                     | This study                        |
| SWY615        | <i>Mata</i> , <i>doa10::KANMX</i> , pSW105, W303 background                                                                                    | This study                        |
| SWY349        | <i>Mata</i> , <i>pep4::HIS3</i> , pSW105, W303 background                                                                                      | This study                        |
| SWY354        | <i>Mata</i> , pSW112, W303 background                                                                                                          | This study                        |
| SWY387        | <i>Mata</i> , <i>sec12-4</i> , pSW112, W303 background                                                                                         | This study                        |
| SWY355        | <i>Mata</i> , <i>cue1::TRP1</i> , pSW112, W303 background                                                                                      | This study                        |
| SWY356        | <i>Mata</i> , <i>hrd1::KANMX</i> , pSW112, W303 background                                                                                     | This study                        |
| SWY369        | <i>Mata</i> , <i>doa10::KANMX</i> , pSW112, W303 background                                                                                    | This study                        |

|        |                                                                |            |
|--------|----------------------------------------------------------------|------------|
| SWY357 | <i>Mata, pep4::HIS3</i> , pSW112, W303 background              | This study |
| SWY358 | <i>Mata</i> , pSW113, W303 background                          | This study |
| SWY388 | <i>Mata, sec12-4</i> , pSW113, W303 background                 | This study |
| SWY359 | <i>Mata, cue1::TRP1</i> , pSW113, W303 background              | This study |
| SWY360 | <i>Mata, hrd1::KANMX</i> , pSW113, W303 background             | This study |
| SWY371 | <i>Mata, doa10::KANMX</i> , pSW113, W303 background            | This study |
| SWY361 | <i>Mata, pep4::HIS3</i> , pSW113, W303 background              | This study |
| SWY420 | <i>Mata, vps10::KANMX</i> , pSW113, W303 background            | This study |
| SWY362 | <i>Mata</i> , pSW114, W303 background                          | This study |
| SWY389 | <i>Mata, sec12-4</i> , pSW114, W303 background                 | This study |
| SWY363 | <i>Mata, cue1::TRP1</i> , pSW114, W303 background              | This study |
| SWY364 | <i>Mata, hrd1::KANMX</i> , pSW114, W303 background             | This study |
| SWY376 | <i>Mata, doa10::KANMX</i> , pSW114, W303 background            | This study |
| SWY365 | <i>Mata, pep4::HIS3</i> , pSW114, W303 background              | This study |
| SWY423 | <i>Mata</i> , pSW119, W303 background                          | This study |
| SWY508 | <i>Mata, sec12-4</i> , pSW119, W303 background                 | This study |
| SWY458 | <i>Mata</i> , pSW122, W303 background                          | This study |
| SWY511 | <i>Mata, sec12-4</i> , pSW122, W303 background                 | This study |
| SWY541 | <i>Mata</i> , pSW144, W303 background                          | This study |
| SWY543 | <i>Mata, cue1::TRP1</i> , pSW144, W303 background              | This study |
| SWY544 | <i>Mata, hrd1::KANMX</i> , pSW144, W303 background             | This study |
| SWY542 | <i>Mata, pep4::HIS3</i> , pSW144, W303 background              | This study |
| SWY561 | <i>Mata, pep4::HIS3, cue1::TRP1</i> , pSW144, W303 background  | This study |
| SWY562 | <i>Mata, pep4::HIS3, hrd1::KANMX</i> , pSW144, W303 background | This study |
| SWY545 | <i>Mata</i> , pSW145, W303 background                          | This study |
| SWY547 | <i>Mata, cue1::TRP1</i> , pSW145, W303 background              | This study |
| SWY548 | <i>Mata, hrd1::KANMX</i> , pSW145, W303 background             | This study |
| SWY546 | <i>Mata, pep4::HIS3</i> , pSW145, W303 background              | This study |
| SWY564 | <i>Mata, pep4::HIS3, cue1::TRP1</i> , pSW145, W303 background  | This study |
| SWY565 | <i>Mata, pep4::HIS3, hrd1::KANMX</i> , pSW145, W303 background | This study |
| SWY579 | <i>Mata</i> , pSW153, W303 background                          | This study |
| SWY581 | <i>Mata, cue1::TRP1</i> , pSW153, W303 background              | This study |
| SWY582 | <i>Mata, hrd1::KANMX</i> , pSW153, W303 background             | This study |
| SWY580 | <i>Mata, pep4::HIS3</i> , pSW153, W303 background              | This study |
| SWY587 | <i>Mata</i> , pSW155, W303 background                          | This study |
| SWY589 | <i>Mata, cue1::TRP1</i> , pSW155, W303 background              | This study |
| SWY590 | <i>Mata, hrd1::KANMX</i> , pSW155, W303 background             | This study |
| SWY588 | <i>Mata, pep4::HIS3</i> , pSW155, W303 background              | This study |
| SWY601 | <i>Mata</i> , pSW156, W303 background                          | This study |
| SWY603 | <i>Mata</i> , pSW157, W303 background                          | This study |
| SWY604 | <i>Mata, pep4::HIS3</i> , pSW157, W303 background              | This study |
| SWY605 | <i>Mata</i> , pSW158, W303 background                          | This study |
| SWY606 | <i>Mata, pep4::HIS3</i> , pSW158, W303 background              | This study |

**Table S2. Plasmids modified by site-directed mutagenesis**

| <b>Plasmid</b> | <b>Protein</b>                        | <b>Primer</b> | <b>Mutation</b>                                                                                                                   | <b>Template</b> | <b>Vector</b> | <b>Source</b> |
|----------------|---------------------------------------|---------------|-----------------------------------------------------------------------------------------------------------------------------------|-----------------|---------------|---------------|
| pSW102         | Wsc1-L31R                             | SWN64         | L31R                                                                                                                              | pSW100          | pRS315        | This study    |
| pSW104         | Wsc1-L63R                             | SWN66         | L63R                                                                                                                              | pSW100          | pRS315        | This study    |
| pSW105         | Wsc1-C98R/<br>G99R                    | SWN67         | C98R, G99R                                                                                                                        | pSW100          | pRS315        | This study    |
| pSW112         | Wsc1-Δ34-44                           | SWN72         | Deletion of D34<br>to Q44                                                                                                         | pSW100          | pRS315        | This study    |
| pSW113         | Wsc1-Δ68-80                           | SWN73         | Deletion of E68<br>to E80                                                                                                         | pSW100          | pRS315        | This study    |
| pSW114         | Wsc1-Δ96-110                          | SWN74         | Deletion of to<br>E96 to D110                                                                                                     | pSW100          | pRS315        | This study    |
| pSW119         | Wsc1-L63R<br>Luminal                  | SWN76         | Deletion of DNA<br>TMD and<br>Cytoplasmic<br>domains of Wsc1-<br>L63R (Deletion<br>of V262 to D378)<br>Deletion of DNA<br>TMD and | pSW104          | pRS315        | This study    |
| pSW122         | Wsc1-Δ68-80<br>Luminal                | SWN76         | cytoplasmic<br>domains of Wsc1<br>Δ68-80<br>Deletion of DNA<br>TMD and                                                            | pSW113          | pRS315        | This study    |
| pSW153         | ED-Wsc1-<br>L63R <sub>Luminal</sub>   | SWN76         | cytoplasmic<br>domains of ED-<br>Wsc1-L63R<br>Deletion of DNA<br>TMD and                                                          | pSW144          | pRS315        | This study    |
| pSW155         | ED-Wsc1-Δ68-<br>80 <sub>Luminal</sub> | SWN76         | cytoplasmic<br>domains of ED-<br>Wsc1-Δ68-80                                                                                      | pSW145          | pRS315        | This study    |
| pSW156         | Wsc1-AAA                              | SWN77         | N344A, P345A,<br>F346A                                                                                                            | pSW147          | pRS315        | This study    |
| pSW157         | Wsc1-L63R-<br>AAA                     | SWN77         | N344A, P345A,<br>F346A                                                                                                            | pSW148          | pRS315        | This study    |
| pSW158         | Wsc1-Δ68-80-<br>AAA                   | SWN77         | N331A, P332A,<br>F333A                                                                                                            | pSW149          | pRS315        | This study    |

**Table S3. Oligonucleotide primers used in this study**

| <b>Primer</b> | <b>Construct</b> | <b>Sequence (5'→3')</b> |
|---------------|------------------|-------------------------|
|---------------|------------------|-------------------------|

---

|       |                              |                                                                 |
|-------|------------------------------|-----------------------------------------------------------------|
| SWN1  | pSW3                         | CGCGGATCCATGAGACCGAACAAAAACAAGTC                                |
| SWN2  | pSW3                         | CTCATGCCATGGCATCAGCTTCGTCTGGATTGACC                             |
| SWN50 | pSW144,<br>pSW145            | GTTTCCCGACTGGAAAAGCGGGCAGTG                                     |
| SWN64 | pSW102                       | GAATACGTGAATTGTTTTAGCTCAAGACCCTCTGACTTTTTCAAAGGCCGA             |
| SWN66 | pSW104                       | CGCAAAAGGTGCAAGCTACTTTGCCAGATATAATCATTGAGAAATGTTATTGTG          |
| SWN67 | pSW105                       | CTTTGGTTACAGCAGTGAGATGTGTAGAAGAGAAGATGCCTATTCTGTGTACCAAC        |
| SWN72 | pSW112                       | GAATTGTTTTAGCTCACTACCCTCTTCGAGTTCACACTGTAACAGTGAG               |
| SWN73 | pSW113                       | CTACTTTGCCCTTTATAATCATTTCATCTACTTCTCTTCATGTAATACG               |
| SWN74 | pSW114                       | ATACGTATTGCTTTGGTTACAGCAGTTCTGACACAAATAGCAATAGCATAAG            |
|       | pSW119,                      |                                                                 |
| SWN76 | pSW122,<br>pSW153,<br>pSW155 | GTAAAACTCATAAAAAGAAAGCCAATGCCATGGCCTACCCATATGATGTTC             |
|       | pSW156,                      |                                                                 |
| SWN77 | pSW157,<br>pSW158            | GCACACCAAAGGGCAAACCTGATATTGCCGCCGCCGACACTCAAGGAGAATAAGTA<br>ACG |
|       | pSW144,                      |                                                                 |
| SWN84 | pSW145                       | GGAAAAAAGCGGCCCAATTCCGTATATGATGATACATATGTTAGGTC                 |
|       | pSW144,                      |                                                                 |
| SWN85 | pSW145                       | TAAGGAGAAACCACCGTGGATCCATTCG                                    |
|       | pSW144,                      |                                                                 |
| SWN86 | pSW145                       | TATGAATACGTGAATTGTTTTAGCTCACTACC                                |
|       | pSW147,                      |                                                                 |
| SWN87 | pSW148,<br>pSW149            | ATAAGAATGCGGCCGCGGAAGGCACCCTTTTCGAAGG                           |
|       | pSW147,                      |                                                                 |
| SWN88 | pSW148,<br>pSW149            | ACATGGATCCTGTTGAGATTTAGCTGTGTTTGTG                              |

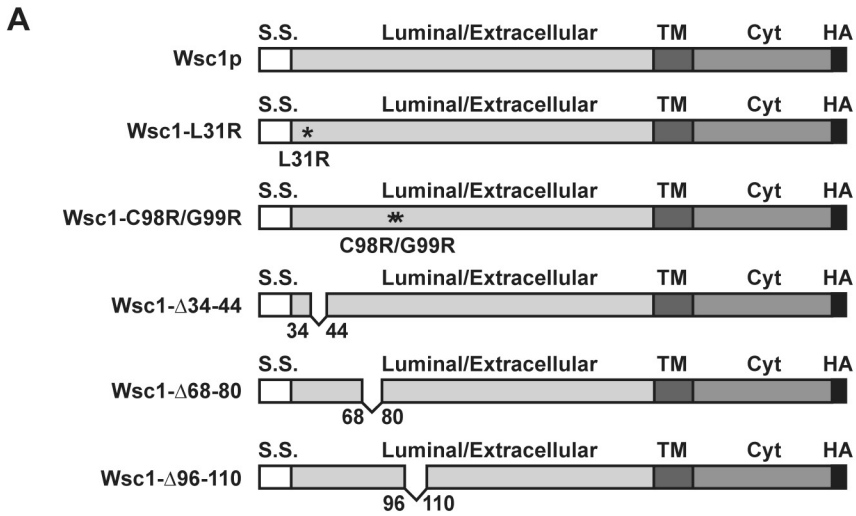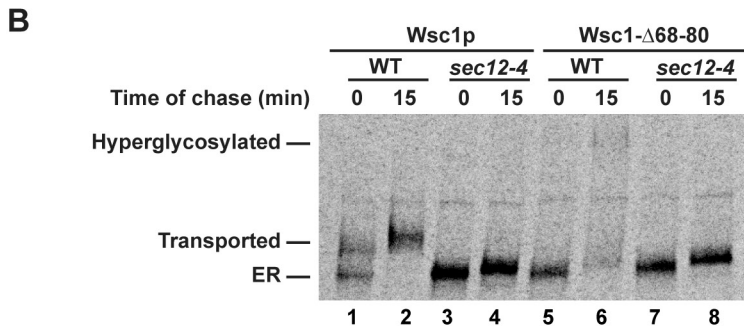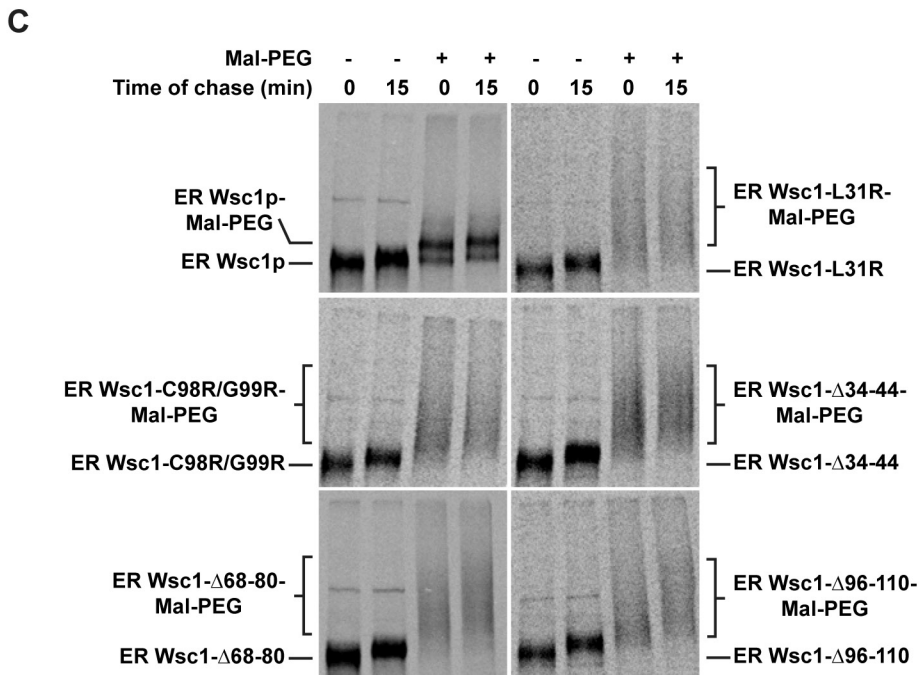

Figure S1

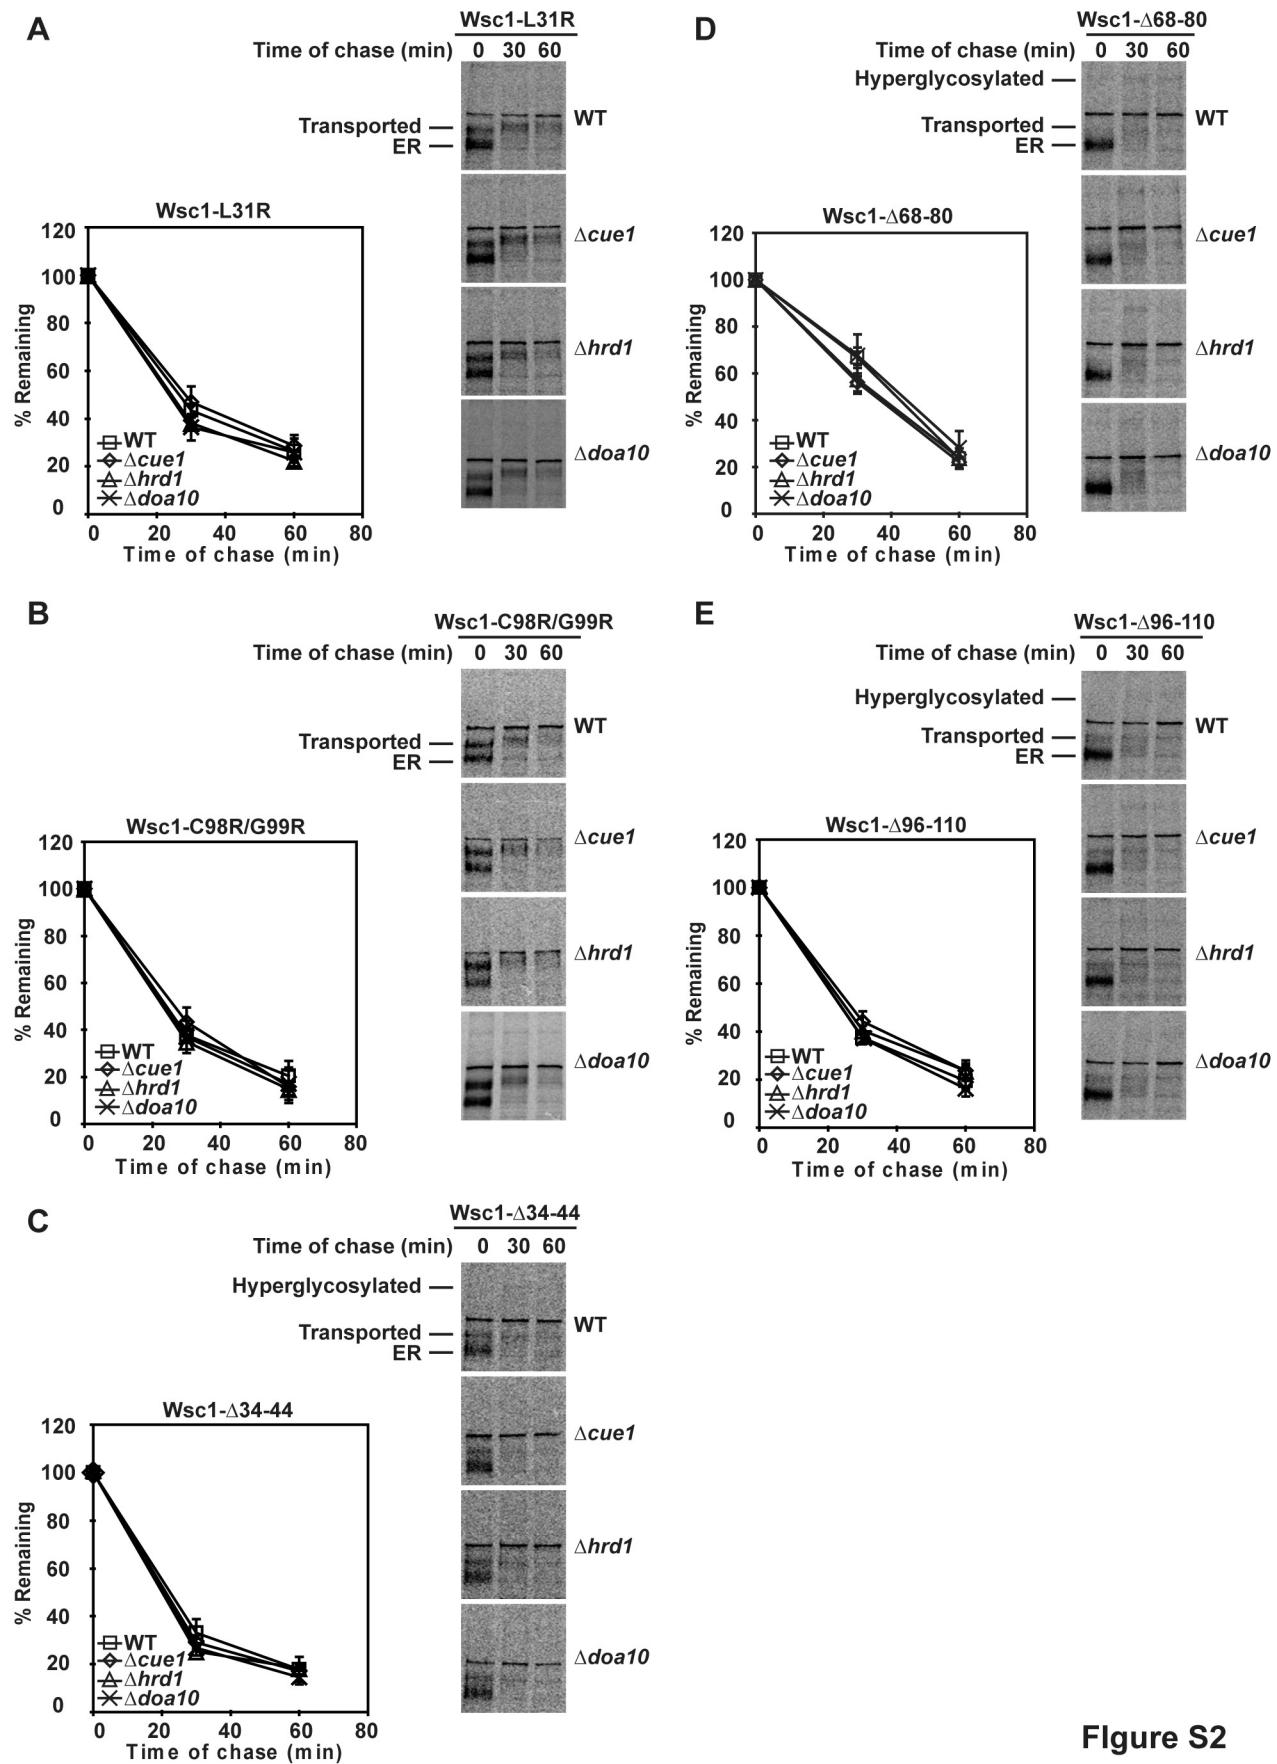

Figure S2



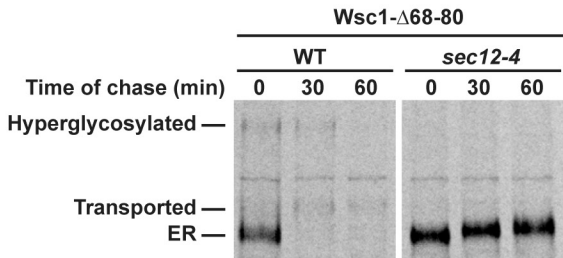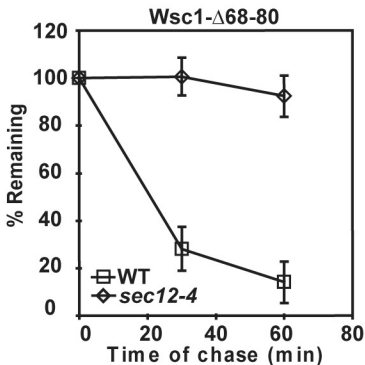

**Figure S3**

**A**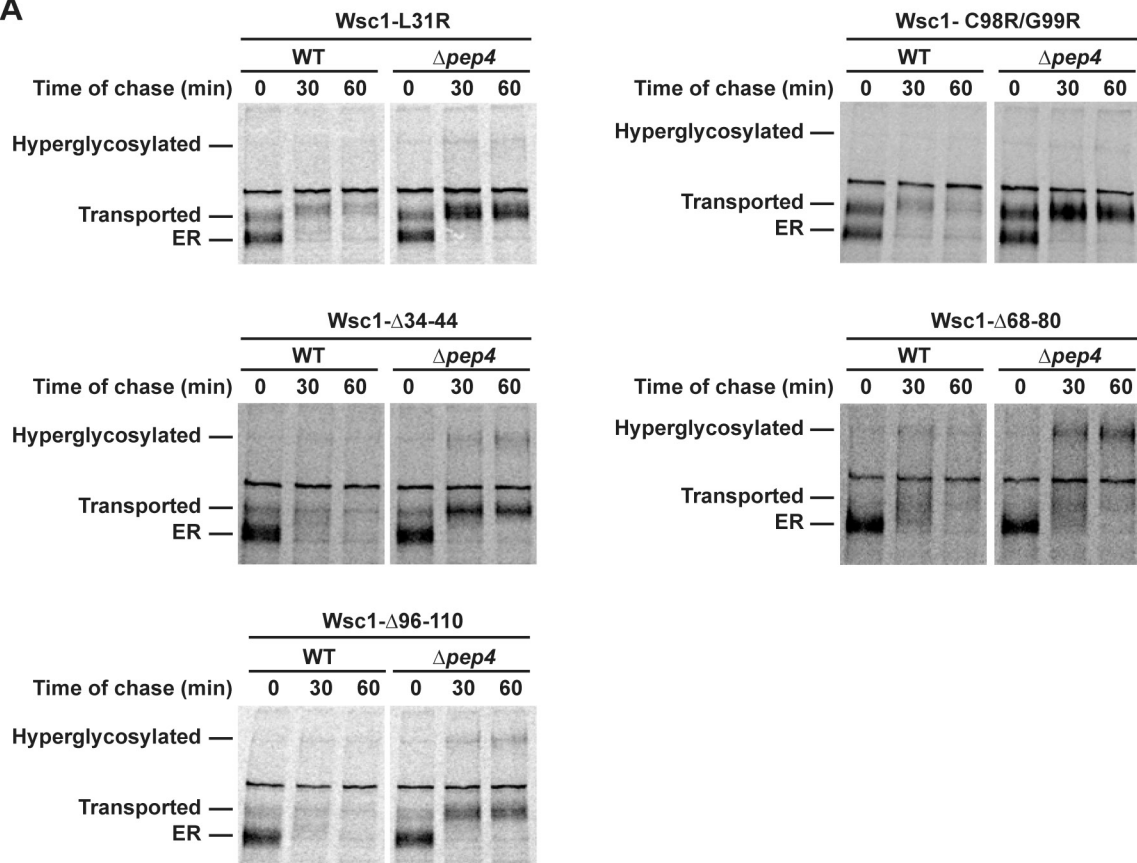**B**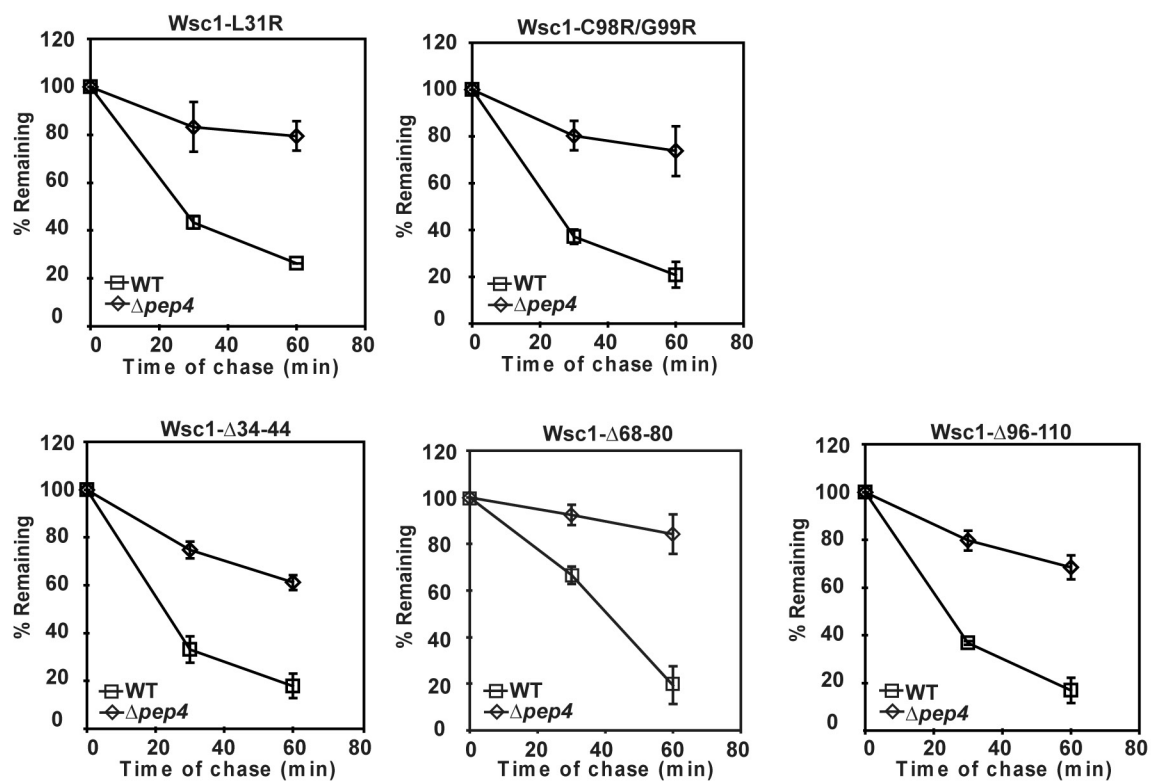**Figure S4**

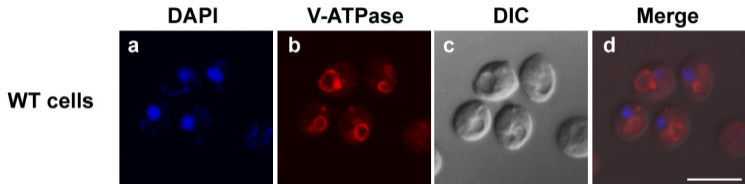

**Figure S5**

**A**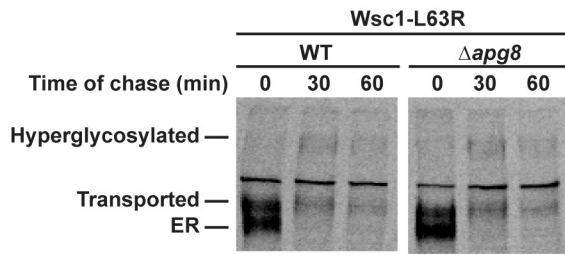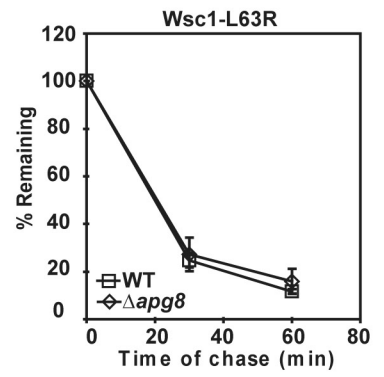**B**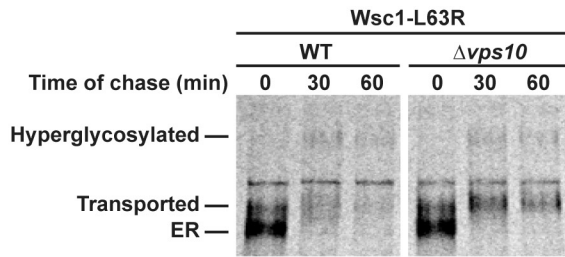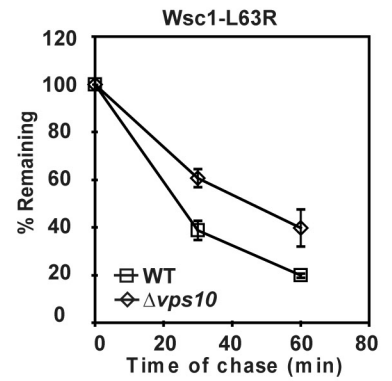

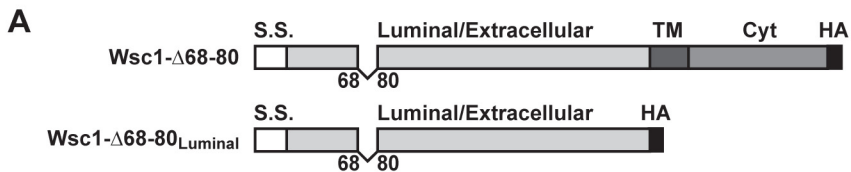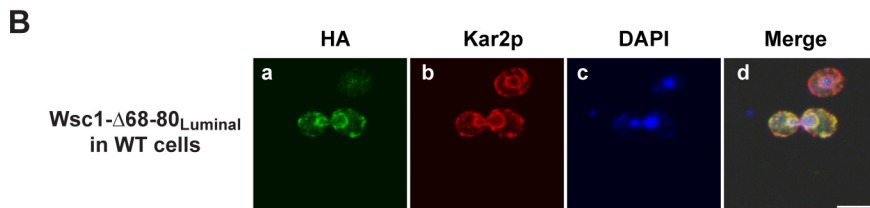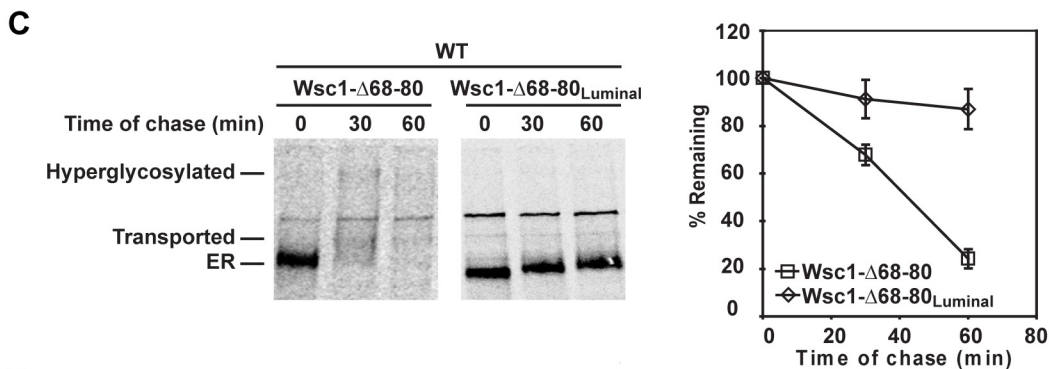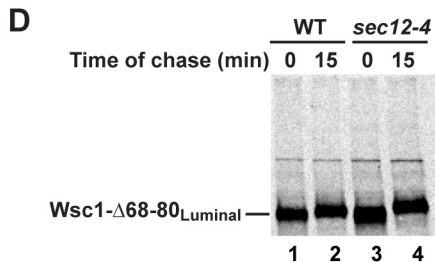

**Figure S7**

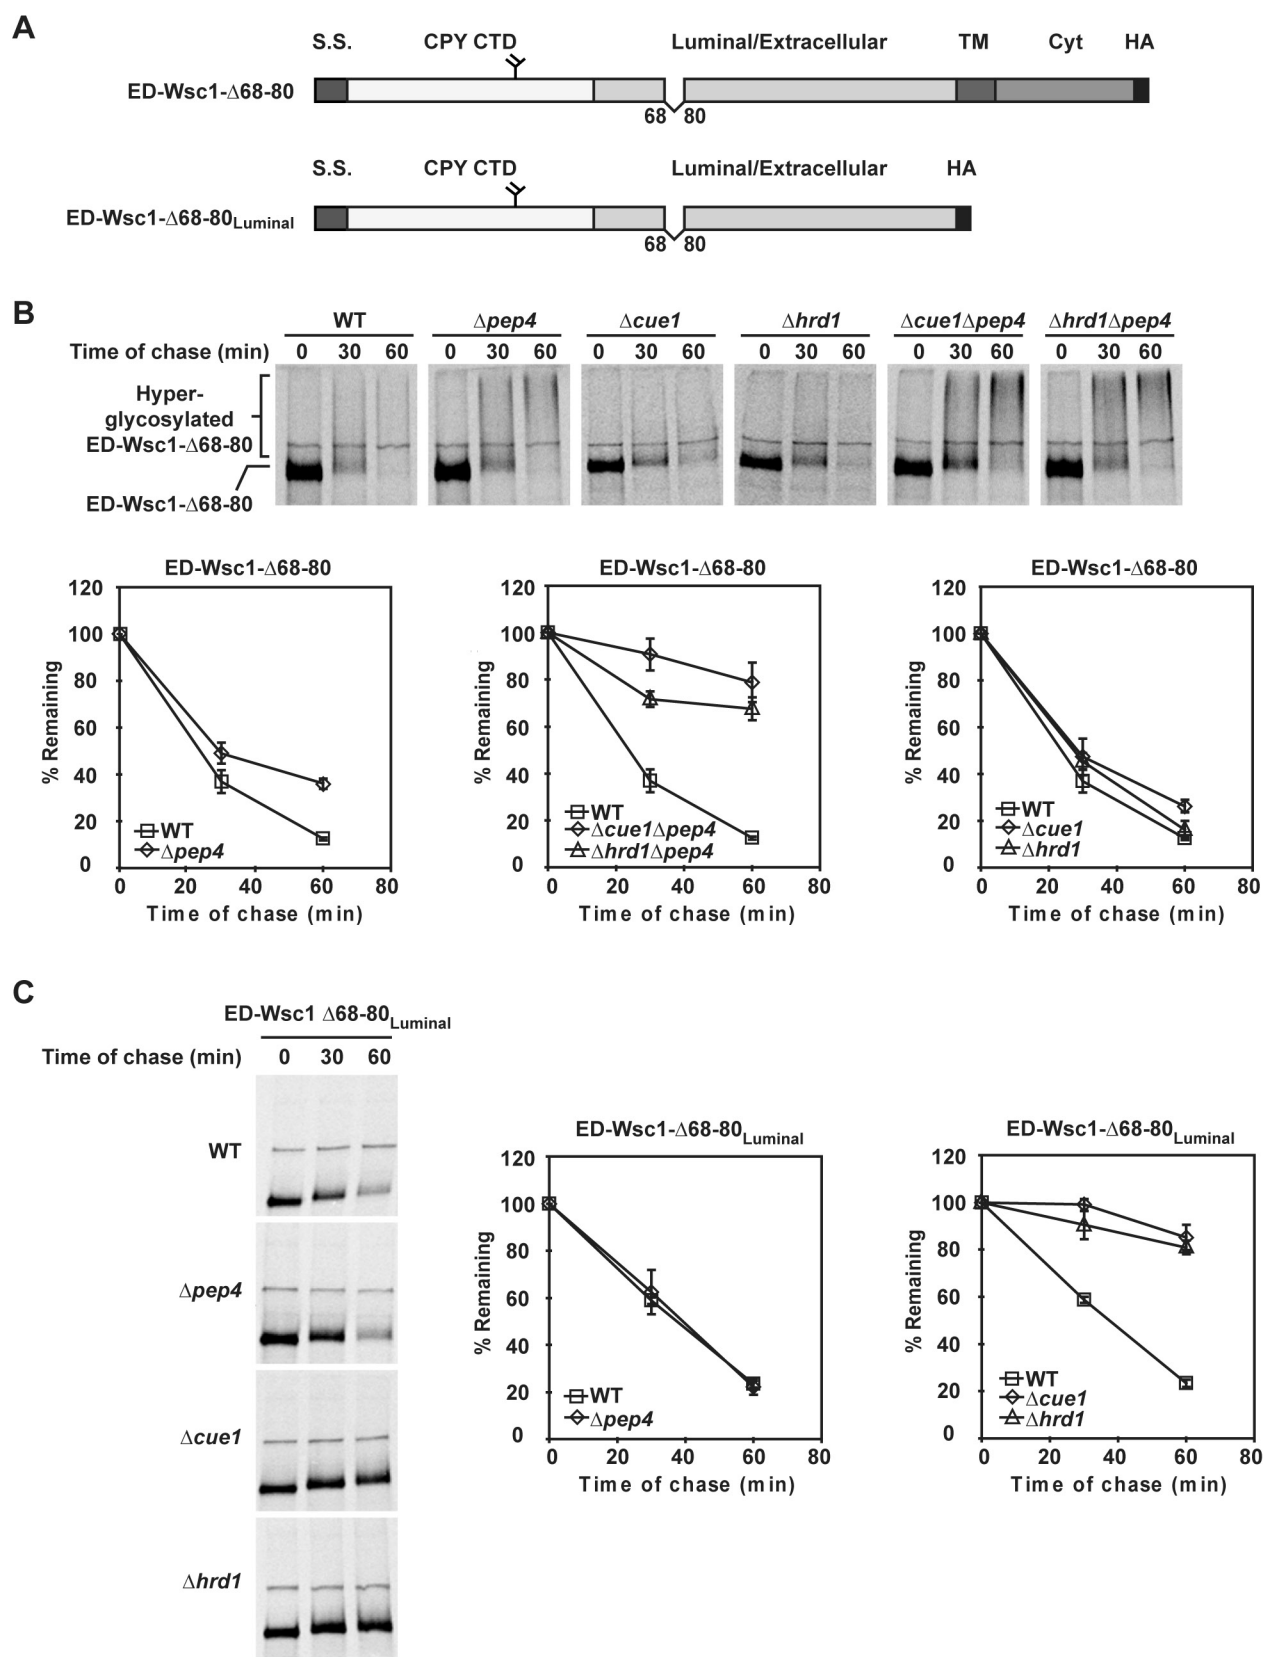

Figure S8
